# Supplementary material for: Kinetic model of GPCR-G protein interactions reveals allokairic modulation of signaling
Source: PubMed Central journal article supplement (PMC8904551; doi:10.1038/s41467-022-28789-5), 2022-03-08
Supplement: 41467_2022_28789_MOESM1_ESM.pdf [file 41467_2022_28789_MOESM1_ESM.pdf]

## **Supplementary Information for**

# **Kinetic model of GPCR-G protein interactions reveals allosteric modulation of signaling**

Kelly J. Culhane<sup>1</sup>, Tejas M. Gupte<sup>1</sup>, Indrani Madhugiri<sup>2</sup>, Chetan J. Gadgil<sup>2,3\*</sup>, Sivaraj Sivaramakrishnan<sup>1\*</sup>

Correspondence to: sivaraj@umn.edu; cj.gadgil@ncl.res.in

### **This PDF file includes:**

Supplementary Note  
Supplemental Figures 1-10  
Supplemental Tables 1 & 2

## Supplementary Note 1

### Proof: Addition of $E_{Ak}$ does not increase steady-state level of bound G protein

Consider reaction scheme and equations in Fig S5. Assuming that the principle of microscopic reversibility is applicable, each reversible reaction is individually at equilibrium, leading to the algebraic equations below, where concentrations represent equilibrium values.

$$\begin{aligned}
 k_{onHR'E} [HR'] [E_{Ak}] &= k_{offHR'E} [HR'E_{Ak}] \\
 k_{forwardE} [HR'E_{Ak}] &= k_{reverseE} [HR^*E_{Ak}] \\
 k_{onHR^*E} [HR^*] [E_{Ak}] &= k_{offHR^*E} [HR^*E_{Ak}] \\
 k_{forward} [HR'] &= k_{reverse} [HR^*] \\
 k_{onHR'G} [HR'] [G] &= k_{offHR'G} [HR'G] \\
 k_{forwardG} [HR'G] &= k_{reverseG} [HR^*G] \\
 k_{onHR^*G} [HR^*] [G] &= k_{offHR^*G} [HR^*G]
 \end{aligned}$$

This can be restated as

$$\frac{[HR']}{[HR^*]} = \frac{k_{reverse}}{k_{forward}} = \frac{k_{reverseE}}{k_{forwardE}} \cdot \frac{K_{HR'E_{Ak}}}{K_{HR^*E_{Ak}}} = \frac{k_{reverseG}}{k_{forwardG}} \cdot \frac{K_{HR'G}}{K_{HR^*G}}$$

or

$$\frac{[HR']}{[HR^*]} = K_{act} = K_1 \cdot \frac{K_{HR'E_{Ak}}}{K_{HR^*E_{Ak}}} = K_2 \cdot \frac{K_{HR'G}}{K_{HR^*G}} \quad (1)$$

$$\text{where: } K_{HR'E_{Ak}} = K_E = \frac{k_{offHR'E}}{k_{onHR'E}}, \quad K_{HR^*E_{Ak}} = \frac{k_{offHR^*E}}{k_{onHR^*E}}, \quad K_1 = \frac{k_{reverseE}}{k_{forwardE}}, \quad K_{act} = \frac{k_{reverse}}{k_{forward}},$$

$$K_{HR'G} = K_D = \frac{k_{offHR'G}}{k_{onHR'G}}, \quad K_{HR^*G} = \frac{K_D}{\alpha} = \frac{k_{offHR^*G}}{k_{onHR^*G}} \quad \text{and} \quad K_2 = \alpha K_{act} = \frac{k_{reverseG}}{k_{forwardG}}$$

Let  $E_{Ak}B$  and  $GB$  denote bound forms of  $E_{Ak}$  and  $G$  respectively:

$$[E_{Ak}B] = [HR'E_{Ak}] + [HR^*E_{Ak}] = (1 + K_1) \cdot [HR^*E_{Ak}] \quad (2)$$

$$[GB] = [HR'G] + [HR^*G] = (1 + K_2) \cdot [HR^*G] \quad (3)$$

Since total HR,  $E_{Ak}$  and  $G$  is constant, we get the conservation equations:

$$E_{Aktot} = [E_{Ak}] + [E_{Ak}B] \quad (4)$$

$$G_{tot} = [G] + [GB] \quad (5)$$

$$HR'_{tot} = [HR'] + [HR^*] + [E_{Ak}B] + [GB] \quad (6)$$

At steady state, setting derivative of the differential equations in Fig S5B to zero, we get:

$$[E_{Ak}] = \left( \frac{K_{HR^*E_{Ak}}}{1 + K_1} \right) \cdot \frac{[E_{Ak}B]}{[HR^*]} \quad (7)$$

$$[G] = \left( \frac{K_{HR^*G}}{1 + K_2} \right) \cdot \frac{[GB]}{[HR^*]} \quad (8)$$

From (4) and (7)

$$E_{Aktot} = [E_{Ak}B] \left( 1 + \left( \frac{K_{HR^*E_{Ak}}}{1 + K_1} \right) \frac{1}{[HR^*]} \right) \quad (9)$$

From (5) and (8),

$$G_{tot} = [GB] \left( 1 + \left( \frac{K_{HR^*G}}{1 + K_2} \right) \frac{1}{[HR^*]} \right) \quad (10)$$

Substituting in (6), we get

$$HR'_{tot} = (1 + k_{act})[HR^*] + [E_{Ak}B] + [GB] \quad (11)$$

$$HR'_{tot} = [HR^*] \left( 1 + k_{act} + \frac{E_{Aktot}}{[HR^*] + \left( \frac{K_{HR^*E_{Ak}}}{1 + K_1} \right)} + \frac{G_{tot}}{[HR^*] + \left( \frac{K_{HR^*G}}{1 + K_2} \right)} \right) \quad (12)$$

Taking partial derivative of (10) with respect to  $E_{Aktot}$ :

$$0 = \frac{\partial[GB]}{\partial E_{Aktot}} \left( 1 + \frac{K_{HR^*G}}{(1 + K_2)[HR^*]} \right) + [GB] \left( \frac{-K_{HR^*G}}{(1 + K_2)[HR^*]^2} \cdot \frac{\partial[HR^*]}{\partial E_{Aktot}} \right)$$

$$\frac{\partial[HR^*]}{\partial E_{Aktot}} = \left( \frac{a_{11}}{a_{12}} \right) \frac{\partial[GB]}{\partial E_{Aktot}} \quad (13)$$

where:  $a_{11} = 1 + \left( \frac{K_{HR^*G}}{(1+K_2)[HR^*]} \right)$  and  $a_{12} = \left( \frac{K_{HR^*G}}{1+K_2} \right) \frac{[GB]}{[HR^*]^2}$

Taking partial derivative of (11) with respect to  $E_{Aktot}$ , and substituting using (13),

$$0 = \frac{\partial[HR^*]}{\partial E_{Aktot}} (1 + k_{act}) + \frac{\partial[E_{Ak}B]}{\partial E_{Aktot}} + \frac{\partial[GB]}{\partial E_{Aktot}}$$

$$\frac{\partial[E_{Ak}B]}{\partial E_{Aktot}} = -a_{21} \cdot \frac{\partial[GB]}{\partial E_{Aktot}} \text{ where } a_{21} = 1 + \frac{a_{11}}{a_{12}} (1 + k_{act}) \quad (14)$$

Taking partial derivative of (9) with respect to  $E_{Aktot}$ , and substituting using (13) and (14),

$$1 = \frac{\partial[E_{Ak}B]}{\partial E_{Aktot}} \left( 1 + \frac{K_{HR^*E_{Ak}}}{(1 + K_1)[HR^*]} \right) + [E_{Ak}B] \left( \frac{-K_{HR^*E_{Ak}}}{(1 + K_1)[HR^*]^2} \cdot \frac{\partial[HR^*]}{\partial E_{Aktot}} \right)$$

$$1 = - \left( a_{21} \left( 1 + \frac{K_{HR^*E_{Ak}}}{(1 + K_1)[HR^*]} \right) + \left( \frac{a_{11}}{a_{12}} \cdot \frac{K_{HR^*E_{Ak}}}{1 + K_1} \cdot \frac{[E_{Ak}B]}{[HR^*]^2} \right) \right) \frac{\partial[GB]}{\partial E_{Aktot}}$$

$$\frac{\partial[GB]}{\partial E_{Aktot}} = \frac{-1}{a_{31}} \quad (15)$$

where:  $a_{31} = a_{21} \left( 1 + \frac{K_{HR^*E_{Ak}}}{(1+K_1)[HR^*]} \right) + \left( \frac{a_{11}}{a_{12}} \right) \left( \frac{K_{HR^*E_{Ak}}}{1+K_1} \right) \left( \frac{[E_{Ak}B]}{[HR^*]^2} \right)$

Since  $a_{31}$  is non-negative,  $\frac{\partial[GB]}{\partial E_{Aktot}} < 0$ , proving that steady state bound G-protein levels cannot increase when a competing modulator is added, irrespective of the binding affinities.

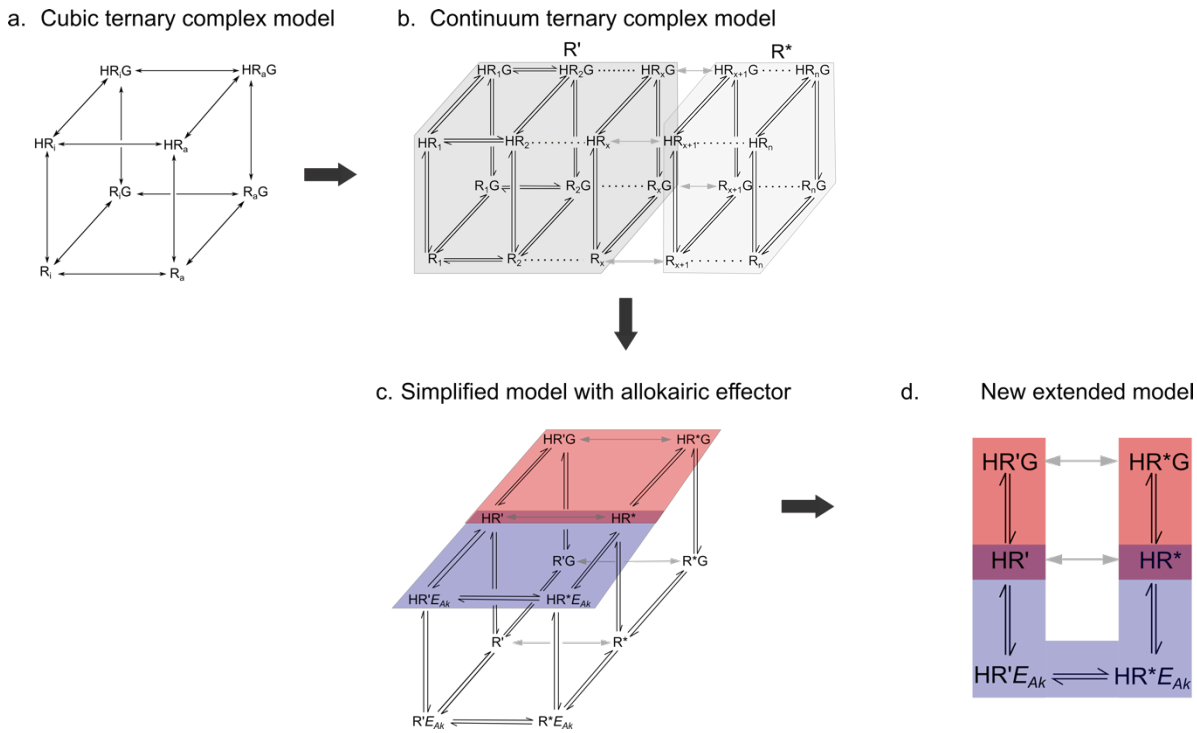

**Supplemental Figure 1: Continuum model of GPCR signaling.** (a) Cubic ternary complex model<sup>3-5</sup> describes hormone (H) and G protein binding to receptor active ( $R_a$ ) and inactive ( $R_i$ ) states (b) New continuum ternary complex model shows hormone and G protein binding to progressively more active receptor states ( $R_n$ ). A rate limiting conformational change occurs between states  $R_x \rightarrow R_{x+1}$ . Lumping receptor states before ( $R'$ ) and after ( $R^*$ ) this rate limiting step leads to a simplified model (c) Simplified model showing additional interaction between  $R'$  and  $R^*$  with an allokaic effector ( $E_{Ak}$ ). Hormone bound receptor ( $HR'$ ,  $HR^*$ ) interactions with  $E_{Ak}$  and G protein are shown in blue and red, respectively. (d) new extended model shows interactions of  $E_{Ak}$  and G protein during ternary complex formation.

**Supplemental Figure 2: Prism Tesseract Model of ligand-receptor-G protein engagement.** The model captures the inclusions of multiple hormones, receptors, and G proteins/modulators. H, R and G in the prism tesseract model below represent the *i*th receptor, *j*th G protein/modulator, and the *k*th hormone.

Multiple ligands, multiple receptors, and multiple G-proteins; each can have two distinct states  
H: Hormone (ligand L)  
R: Receptor  
G: G-protein (if  $G_j$  is cognate G-protein, then  $G_j$ , is noncognate ( $E_{Ak}$ ))

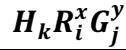

Superscript denotes species state, and subscript denotes species identity

|                                                                     |                                               |
|---------------------------------------------------------------------|-----------------------------------------------|
| Hormone H can exist in bound and unbound forms                      | k: hormone identity = {1, 2, ....., $n_H$ }   |
| x: receptor state = {R', R*}                                        | i: receptor identity = {1, 2, ....., $n_R$ }  |
| y: G-protein state = {G <sup>inactive</sup> , G <sup>active</sup> } | j: G-protein identity = {1, 2, ....., $n_G$ } |

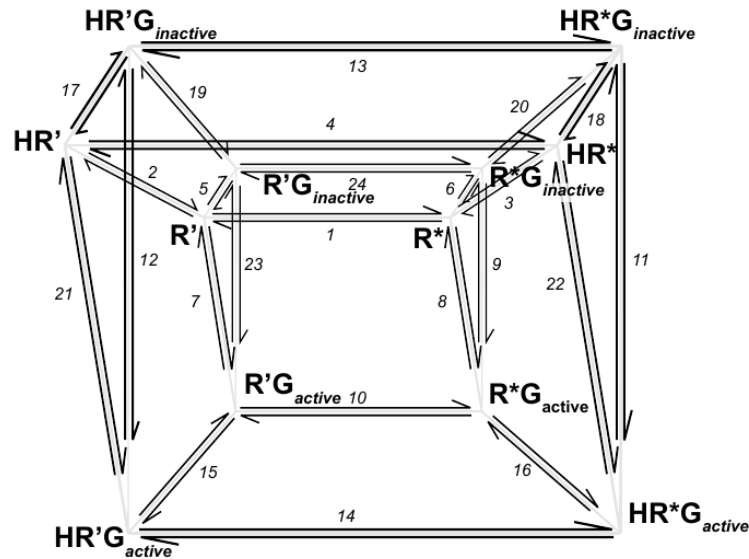

The unbound hormone H (ligand L), and the two distinct states of unbound G protein (G<sup>inactive</sup> and G<sup>active</sup>) are not explicitly shown in the above tesseract figure. Also, the figure does not explicitly depict the spontaneous (uncatalyzed) transition between the two G protein states.

Reactions:

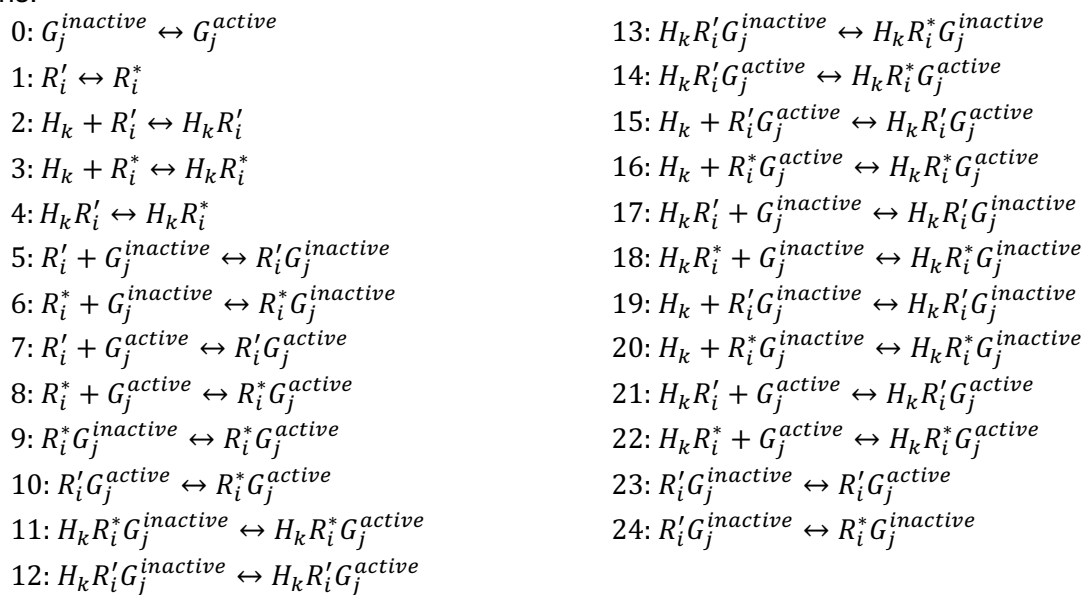

### Supplemental Figure 3: Tesseract model equations.

|                                                                                                                                                                                                                                                                                                                                                                                                                                                                                        |                                                                                                                                                                                                                                                                                                                                                                                                                                                                                   |
|----------------------------------------------------------------------------------------------------------------------------------------------------------------------------------------------------------------------------------------------------------------------------------------------------------------------------------------------------------------------------------------------------------------------------------------------------------------------------------------|-----------------------------------------------------------------------------------------------------------------------------------------------------------------------------------------------------------------------------------------------------------------------------------------------------------------------------------------------------------------------------------------------------------------------------------------------------------------------------------|
| $\frac{d[H_k]}{dt} = \sum_{i=1}^{n_R} \sum_{j=1}^{n_G} (-k2_{ik}^+[H_k][R_i^-] + k2_{ik}^-[H_k R_i^+] - k3_{ik}^+[H_k][R_i^*] + k3_{ik}^-[H_k R_i^*] - k15_{ijk}^+[H_k][R_i^* G_j^{active}] + k15_{ijk}^-[H_k R_i^* G_j^{active}] - k16_{ijk}^+[H_k][R_i^* G_j^{inactive}] + k16_{ijk}^-[H_k R_i^* G_j^{inactive}] - k19_{ijk}^+[H_k][R_i^* G_j^{inactive}] + k19_{ijk}^-[H_k R_i^* G_j^{inactive}] - k20_{ijk}^+[H_k][R_i^* G_j^{inactive}] + k20_{ijk}^-[H_k R_i^* G_j^{inactive}])$ |                                                                                                                                                                                                                                                                                                                                                                                                                                                                                   |
| $\frac{d[R_i^-]}{dt} = k1_{i-}[R_i^+] - k1_{i+}[R_i^-] + \sum_{k=1}^{n_H} (k2_{ik}^-[H_k R_i^+] - k2_{ik}^+[H_k][R_i^-]) + \sum_{j=1}^{n_G} (k5_{ij}^-[R_i^* G_j^{inactive}] - k5_{ij}^+[R_i^-][G_j^{inactive}] + k7_{ij}^-[R_i^* G_j^{active}] - k7_{ij}^+[R_i^-][G_j^{active}])$                                                                                                                                                                                                     | $\frac{d[R_i^*]}{dt} = k1_{i+}[R_i^-] - k1_{i-}[R_i^*] + \sum_{k=1}^{n_H} (k3_{ik}^-[H_k R_i^*] - k3_{ik}^+[H_k][R_i^*]) + \sum_{j=1}^{n_G} (k6_{ij}^-[R_i^* G_j^{inactive}] - k6_{ij}^+[R_i^-][G_j^{inactive}] + k8_{ij}^-[R_i^* G_j^{active}] - k8_{ij}^+[R_i^+][G_j^{active}])$                                                                                                                                                                                                |
| $\frac{d[G_j^{active}]}{dt} = k0_j^+[G_j^{inactive}] - k0_j^-[G_j^{active}] + \sum_{k=1}^{n_H} \sum_{i=1}^{n_R} \left( \begin{array}{l} k7_{ij}^-[R_i^* G_j^{active}] - k7_{ij}^+[R_i^-][G_j^{active}] \\ + k8_{ij}^+[R_i^* G_j^{active}] - k8_{ij}^-[R_i^-][G_j^{active}] \\ + k21_{ijk}^-[H_k R_i^* G_j^{active}] - k21_{ijk}^+[H_k R_i^-][G_j^{active}] \\ + k22_{ijk}^-[H_k R_i^* G_j^{active}] - k22_{ijk}^+[H_k R_i^-][G_j^{active}] \end{array} \right)$                        | $\frac{d[G_j^{inactive}]}{dt} = k0_j^-[G_j^{active}] - k0_j^+[G_j^{inactive}] + \sum_{k=1}^{n_H} \sum_{i=1}^{n_R} \left( \begin{array}{l} k5_{ij}^-[R_i^* G_j^{inactive}] - k5_{ij}^+[R_i^-][G_j^{inactive}] \\ + k6_{ij}^-[R_i^* G_j^{inactive}] - k6_{ij}^+[R_i^-][G_j^{inactive}] \\ + k17_{ijk}^-[H_k R_i^* G_j^{inactive}] - k17_{ijk}^+[H_k R_i^-][G_j^{inactive}] \\ + k18_{ijk}^-[H_k R_i^* G_j^{inactive}] - k18_{ijk}^+[H_k R_i^-][G_j^{inactive}] \end{array} \right)$ |
| $\frac{d[H_k R_i^-]}{dt} = k2_{ik}^+[H_k][R_i^-] - (k2_{ik}^- + k4_{ik}^+)[H_k R_i^-] + k4_{ik}^-[H_k R_i^*] + \sum_{j=1}^{n_G} (k17_{ijk}^-[H_k R_i^* G_j^{inactive}] - k17_{ijk}^+[H_k R_i^-][G_j^{inactive}] + k21_{ijk}^-[H_k R_i^* G_j^{active}] - k21_{ijk}^+[H_k R_i^-][G_j^{active}])$                                                                                                                                                                                         | $\frac{d[H_k R_i^*]}{dt} = k3_{ik}^+[H_k][R_i^*] - (k3_{ik}^- + k4_{ik}^-)[H_k R_i^*] + k4_{ik}^+[H_k R_i^-] + \sum_{j=1}^{n_G} (k18_{ijk}^-[H_k R_i^* G_j^{inactive}] - k18_{ijk}^+[H_k R_i^-][G_j^{inactive}] + k22_{ijk}^-[H_k R_i^* G_j^{active}] - k22_{ijk}^+[H_k R_i^-][G_j^{active}])$                                                                                                                                                                                    |
| $\frac{d[R_i^* G_j^{inactive}]}{dt} = k5_{ij}^-[R_i^-][G_j^{inactive}] + k23_{ij}^-[R_i^* G_j^{active}] - (k5_{ij}^- + k23_{ij}^+ + k24_{ij}^+)[R_i^* G_j^{inactive}] + k24_{ij}^-[R_i^- G_j^{inactive}] + \sum_{k=1}^{n_H} (k19_{ijk}^-[H_k R_i^* G_j^{inactive}] - k19_{ijk}^+[H_k][R_i^* G_j^{inactive}])$                                                                                                                                                                          | $\frac{d[R_i^* G_j^{active}]}{dt} = k6_{ij}^+[R_i^-][G_j^{inactive}] + k9_{ij}^-[R_i^* G_j^{active}] - (k6_{ij}^- + k9_{ij}^+ + k24_{ij}^-)[R_i^* G_j^{active}] + k24_{ij}^+[R_i^- G_j^{active}] + \sum_{k=1}^{n_H} (k20_{ijk}^-[H_k R_i^* G_j^{active}] - k20_{ijk}^+[H_k][R_i^* G_j^{active}])$                                                                                                                                                                                 |
| $\frac{d[R_i^- G_j^{active}]}{dt} = k7_{ij}^+[R_i^-][G_j^{active}] + k23_{ij}^+[R_i^* G_j^{inactive}] - (k7_{ij}^- + k23_{ij}^+ + k10_{ij}^+)[R_i^- G_j^{active}] + k10_{ij}^-[R_i^* G_j^{active}] + \sum_{k=1}^{n_H} (k15_{ijk}^-[H_k R_i^- G_j^{active}] - k15_{ijk}^+[H_k][R_i^- G_j^{active}])$                                                                                                                                                                                    | $\frac{d[R_i^- G_j^{inactive}]}{dt} = k8_{ij}^+[R_i^-][G_j^{active}] + k9_{ij}^+[R_i^* G_j^{inactive}] - (k8_{ij}^- + k9_{ij}^+ + k10_{ij}^-)[R_i^- G_j^{inactive}] + k10_{ij}^-[R_i^* G_j^{inactive}] + \sum_{k=1}^{n_H} (k16_{ijk}^-[H_k R_i^- G_j^{inactive}] - k16_{ijk}^+[H_k][R_i^- G_j^{inactive}])$                                                                                                                                                                       |
| $\frac{d[H_k R_i^- G_j^{active}]}{dt} = k14_{ijk}^-[H_k R_i^- G_j^{active}] - k14_{ijk}^+[H_k R_i^* G_j^{active}] - k12_{ijk}^-[H_k R_i^- G_j^{active}] + k12_{ijk}^+[H_k R_i^* G_j^{inactive}] + k15_{ijk}^+[H_k][R_i^- G_j^{active}] - k15_{ijk}^-[H_k R_i^* G_j^{active}] - k21_{ijk}^-[H_k R_i^- G_j^{active}] + k21_{ijk}^+[H_k R_i^*][G_j^{active}]$                                                                                                                             | $\frac{d[H_k R_i^* G_j^{active}]}{dt} = k14_{ijk}^+[H_k R_i^* G_j^{active}] - k14_{ijk}^-[H_k R_i^- G_j^{active}] - k11_{ijk}^-[H_k R_i^* G_j^{active}] + k11_{ijk}^+[H_k R_i^- G_j^{inactive}] + k16_{ijk}^+[H_k][R_i^* G_j^{active}] - k16_{ijk}^-[H_k R_i^- G_j^{active}] - k22_{ijk}^-[H_k R_i^* G_j^{active}] + k22_{ijk}^+[H_k R_i^-][G_j^{active}]$                                                                                                                        |
| $\frac{d[H_k R_i^- G_j^{inactive}]}{dt} = k13_{ijk}^-[H_k R_i^- G_j^{inactive}] + k12_{ijk}^-[H_k R_i^* G_j^{active}] + k19_{ijk}^+[H_k][R_i^- G_j^{inactive}] + k17_{ijk}^+[H_k R_i^*][G_j^{inactive}] - (k13_{ijk}^+ + k12_{ijk}^+ + k19_{ijk}^- + k17_{ijk}^-)[H_k R_i^- G_j^{inactive}]$                                                                                                                                                                                           | $\frac{d[H_k R_i^* G_j^{inactive}]}{dt} = k13_{ijk}^+[H_k R_i^* G_j^{inactive}] + k11_{ijk}^-[H_k R_i^- G_j^{active}] + k20_{ijk}^+[H_k][R_i^* G_j^{inactive}] + k18_{ijk}^+[H_k R_i^-][G_j^{inactive}] - (k13_{ijk}^- + k11_{ijk}^- + k20_{ijk}^- + k18_{ijk}^-)[H_k R_i^* G_j^{inactive}]$                                                                                                                                                                                      |

**Allosteric binding of G proteins:** If there are multiple modulators binding to  $R_i^x$ , say a cognate  $G_{j1}^y$  and noncognate  $G_{j2}^y$ , competitive modulators will replace G in the inner prism of the truncated tesseract; and noncompetitive mediators will in addition form  $R_i^x G_{j1}^y G_{j2}^y$  (and  $H_k R_i^x G_{j1}^y G_{j2}^y$ ) complexes. Allosteric modulators will lead to binding of  $G_{j2}^y$  to all nodes of this truncated tesseract. And the above equations will have to be modified accordingly to accommodate for change due to these additional reactions.

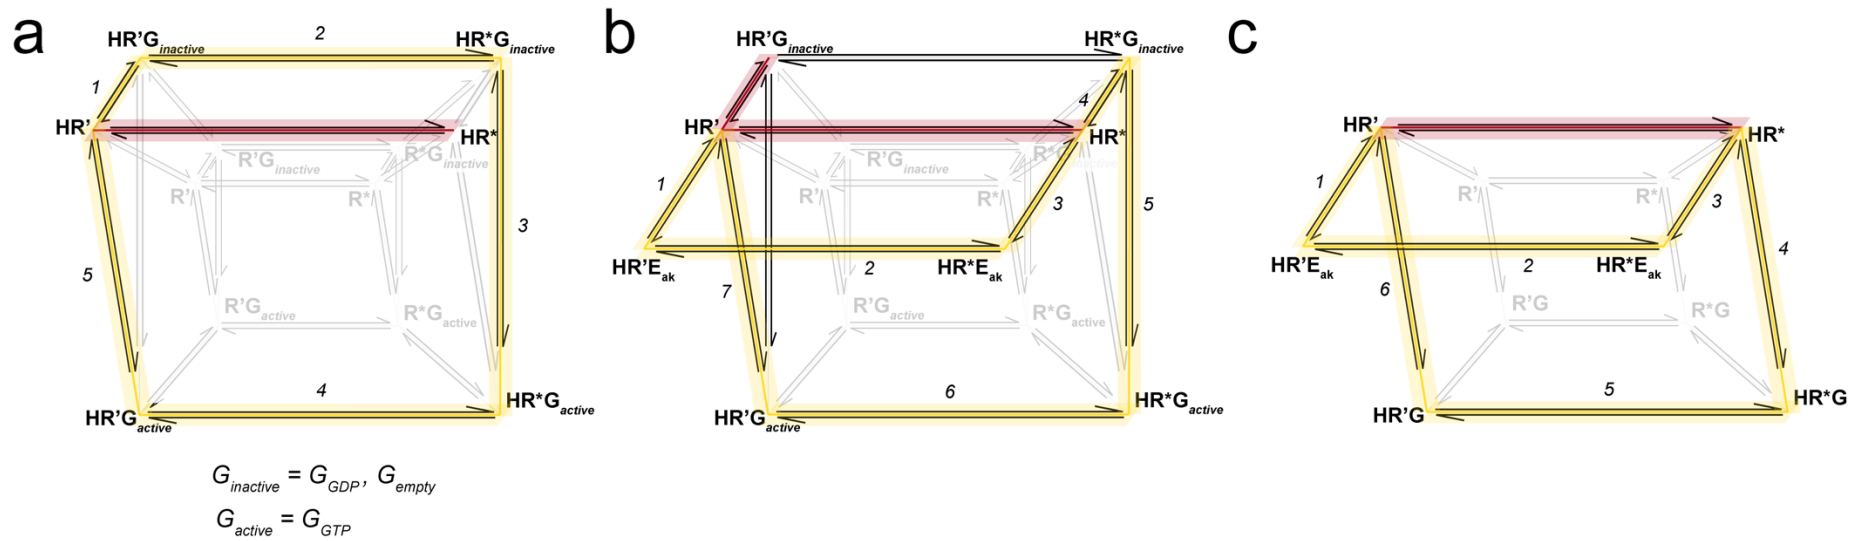

**Supplemental Figure 4: Tesseract model extensions.** (a) Sequence of events leading to G protein activation (Gregorio et al., Nature, 2017) highlighting the conformation change in the receptor triggered by the G protein (HR' to HR\*). (b) Weak interaction between HR' and G protein (red arrow) is overcome by allosteric effector ( $E_{Ak}$ ). (c) Simplified version of (b) with a single G protein interaction state. Numbering depicts the kinetically favorable sequence of events in each scheme.

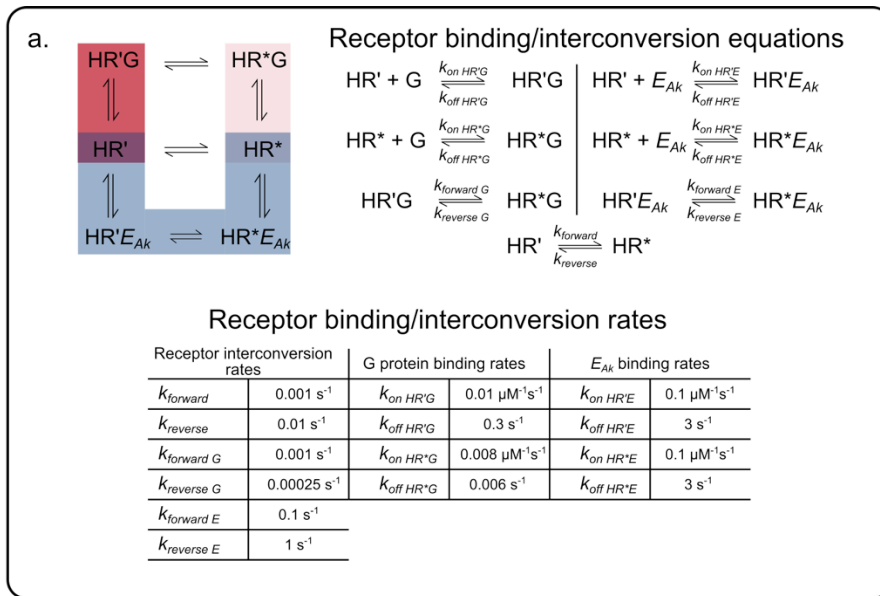

b. Change in each species over time

$$\begin{aligned} d\text{HR}'/dt &= -k_{\text{on HR}'\text{G}}[\text{HR}'][\text{G}] + k_{\text{off HR}'\text{G}}[\text{HR}'\text{G}] - k_{\text{on HR}'E_{\text{Ak}}}[\text{HR}'][\text{E}_{\text{Ak}}] + k_{\text{off HR}'E_{\text{Ak}}}[\text{HR}'E_{\text{Ak}}] - k_{\text{forward}}[\text{HR}'] + k_{\text{reverse}}[\text{HR}^*] \\ d\text{HR}^*/dt &= -k_{\text{on HR}^*\text{G}}[\text{HR}^*][\text{G}] + k_{\text{off HR}^*\text{G}}[\text{HR}^*\text{G}] - k_{\text{on HR}^*E_{\text{Ak}}}[\text{HR}^*][\text{E}_{\text{Ak}}] + k_{\text{off HR}^*E_{\text{Ak}}}[\text{HR}^*E_{\text{Ak}}] - k_{\text{reverse}}[\text{HR}^*] + k_{\text{forward}}[\text{HR}'] \\ d\text{G}/dt &= -k_{\text{on HR}'\text{G}}[\text{HR}'][\text{G}] + k_{\text{off HR}'\text{G}}[\text{HR}'\text{G}] - k_{\text{on HR}^*\text{G}}[\text{HR}^*][\text{G}] + k_{\text{off HR}^*\text{G}}[\text{HR}^*\text{G}] \\ d\text{E}_{\text{Ak}}/dt &= -k_{\text{on HR}'E_{\text{Ak}}}[\text{HR}'][\text{E}_{\text{Ak}}] + k_{\text{off HR}'E_{\text{Ak}}}[\text{HR}'E_{\text{Ak}}] - k_{\text{on HR}^*E_{\text{Ak}}}[\text{HR}^*][\text{E}_{\text{Ak}}] + k_{\text{off HR}^*E_{\text{Ak}}}[\text{HR}^*E_{\text{Ak}}] \\ d\text{HR}'\text{G}/dt &= k_{\text{on HR}'\text{G}}[\text{HR}'][\text{G}] - k_{\text{off HR}'\text{G}}[\text{HR}'\text{G}] - k_{\text{forward G}}[\text{HR}'\text{G}] + k_{\text{reverse G}}[\text{HR}^*\text{G}] \\ d\text{HR}^*\text{G}/dt &= k_{\text{on HR}^*\text{G}}[\text{HR}^*][\text{G}] - k_{\text{off HR}^*\text{G}}[\text{HR}^*\text{G}] - k_{\text{reverse G}}[\text{HR}^*\text{G}] + k_{\text{forward G}}[\text{HR}'\text{G}] \\ d\text{HR}'E_{\text{Ak}}/dt &= k_{\text{on HR}'E_{\text{Ak}}}[\text{HR}'][\text{E}_{\text{Ak}}] - k_{\text{off HR}'E_{\text{Ak}}}[\text{HR}'E_{\text{Ak}}] - k_{\text{forward E}}[\text{HR}'E_{\text{Ak}}] + k_{\text{reverse E}}[\text{HR}^*E_{\text{Ak}}] \\ d\text{HR}^*E_{\text{Ak}}/dt &= k_{\text{on HR}^*E_{\text{Ak}}}[\text{HR}^*][\text{E}_{\text{Ak}}] - k_{\text{off HR}^*E_{\text{Ak}}}[\text{HR}^*E_{\text{Ak}}] - k_{\text{reverse E}}[\text{HR}^*E_{\text{Ak}}] + k_{\text{forward E}}[\text{HR}'E_{\text{Ak}}] \end{aligned}$$

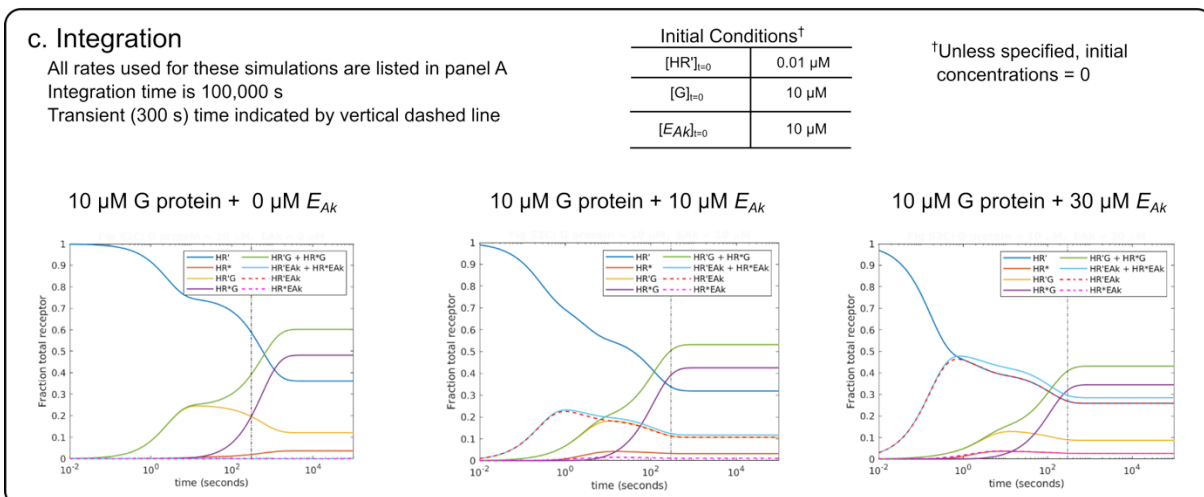

**Supplemental Figure 5: Simulation parameters and single integration examples. (a)** Binding and interconversion equations used in the simulations with parameters indicated in each equation and specified in the parameter table **(b)** Derivatives of the equations in panel A were used to determine the change of each species over time **(c)** Integration details and example 100,000 s integrations with 10  $\mu\text{M}$  G protein with 0  $\mu\text{M}$   $E_{\text{Ak}}$ , 10  $\mu\text{M}$   $E_{\text{Ak}}$  or 30  $\mu\text{M}$   $E_{\text{Ak}}$ .



a. No peptide SPASM sensor FRET decay controls

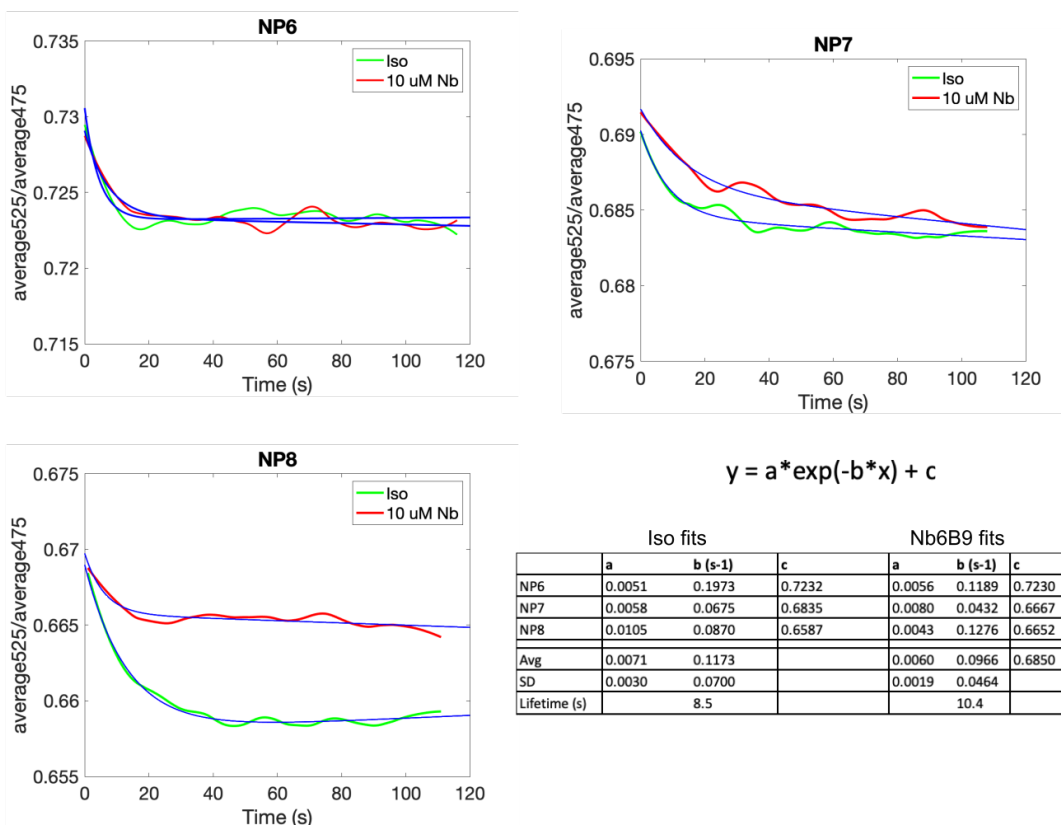

b. NBS quenching of NATA fluorescence control

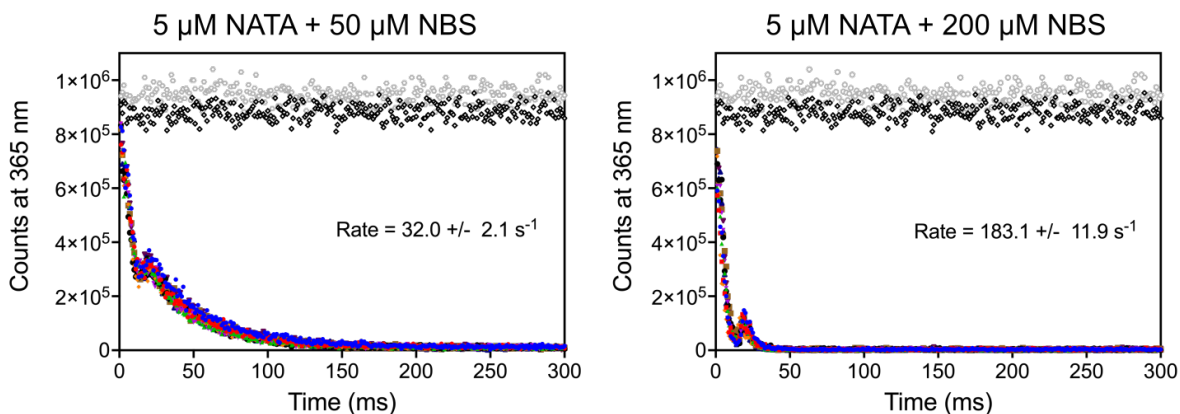

**Supplemental Figure 6: Stopped flow controls and supporting data.** (a)  $\beta$ 2AR-No peptide SPASM sensors FRET decays with and without the addition of Nb6B9 show consistent mixing time of crude membranes ( $\sim 15$  s) as  $\beta$ 2AR-Spep SPASM sensors in Fig. 1.  $\beta$ 2AR-No peptide SPASM sensors show similar rates of decay in the presence and absence of Nb6B9. (b) N-acetyl-tryptophanamide (NATA) and N-bromosuccinimide (NBS) quenching controls used to calibrate the stopped-flow machine show increased quenching with high quencher (NBS) concentration.

## Stopped flow decay curves and fitting parameters

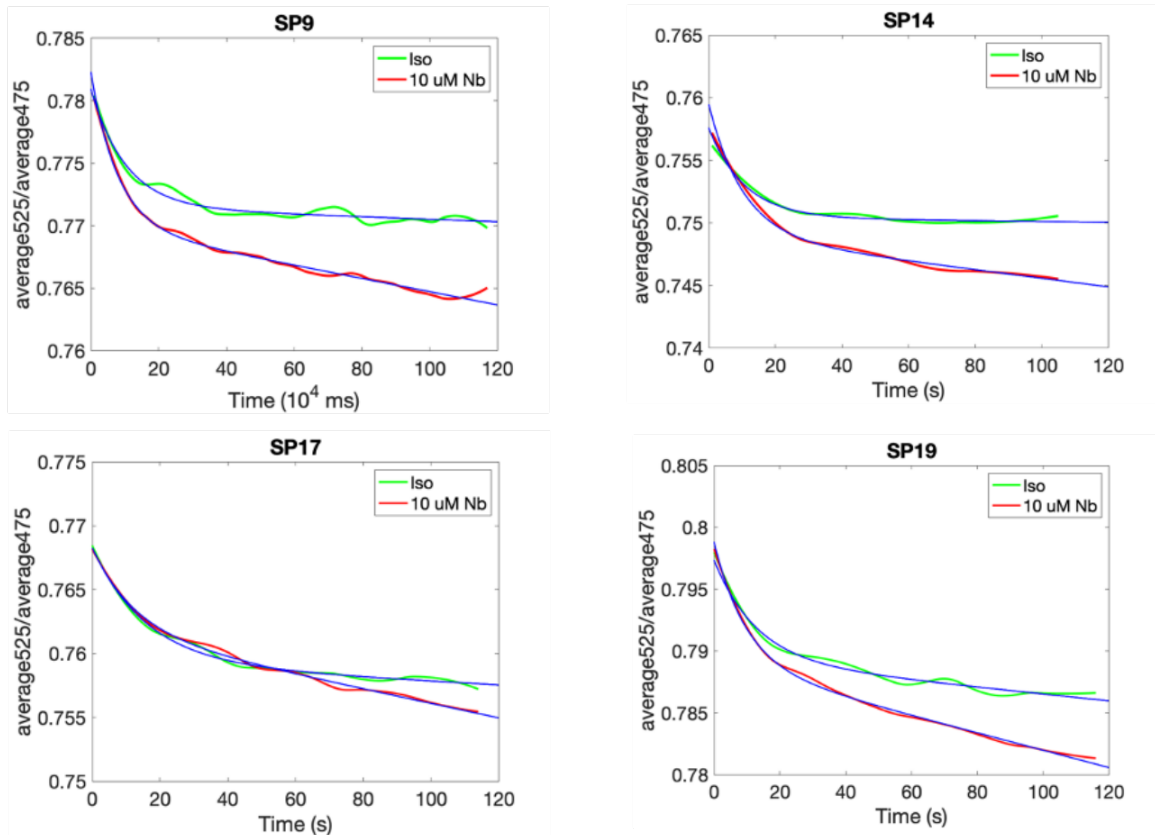

$$y = a * \exp(-b * x) + c * \exp(-d * x) + e * \exp(-f * x) + g$$

|              | a                   | b (s-1) | c      | d (s-1) | e      | f (s-1) | g      |
|--------------|---------------------|---------|--------|---------|--------|---------|--------|
|              | Fixed to iso decays |         |        |         |        |         |        |
| S9           | 0.0089              | 0.0755  | 0.0051 | 0.0062  | 0.0015 | 0.3871  | 0.7585 |
| S14          | 0.0066              | 0.0843  | 0.0076 | 0.0066  | 0.0022 | 0.1269  | 0.7417 |
| S17          | 0.0099              | 0.0478  | 0.0024 | 0.0076  | 0.0021 | 0.4436  | 0.7579 |
| S19          | 0.0101              | 0.0661  | 0.0073 | 0.0061  | 0.0015 | 0.2098  | 0.7798 |
| Avg          | 0.0089              | 0.0684  | 0.0056 | 0.0066  | 0.0018 | 0.2919  | 0.7595 |
| SD           | 0.0016              | 0.0156  | 0.0024 | 0.0007  | 0.0004 | 0.1484  | 0.0156 |
| Lifetime (s) |                     | 14.6    |        | 150.9   |        | 3.4     |        |

**Supplemental Figure 7: Individual  $\beta$ 2AR-Spep SPASM sensor decays and fitting parameters.** Each decay curve shows the average counts at 525nm/the average counts at 475nm for at least 5 injections for a given membrane. Fitting parameters (table) show the slow and fast rates calculated for each batch of membranes tested (parameters b and d) as well and the rate's relative proportion of the decay curve (parameters c and e, respectively).

# Simulating Nb6B9 quenching of GPCR - G peptide interactions

## a. NB6B9-Receptor interactions and simulation parameters

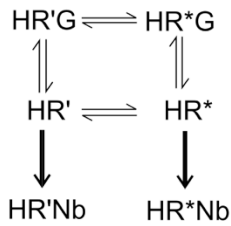

| Receptor interconversion rates |                          | G protein binding rates |                                        | Nb6B9 binding rates |                                     |
|--------------------------------|--------------------------|-------------------------|----------------------------------------|---------------------|-------------------------------------|
| $k_{forward}$                  | 0.001 s <sup>-1</sup>    | $k_{on\ HR'G}$          | 0.01 μM <sup>-1</sup> s <sup>-1</sup>  | $k_{on\ HR'Nb}$     | 10 μM <sup>-1</sup> s <sup>-1</sup> |
| $k_{reverse}$                  | 0.01 s <sup>-1</sup>     | $k_{off\ HR'G}$         | 0.3 s <sup>-1</sup>                    | $k_{off\ HR'Nb}$    | 0.01 s <sup>-1</sup>                |
| $k_{forward\ G}$               | 0.0001 s <sup>-1</sup>   | $k_{on\ HR^*G}$         | 0.008 μM <sup>-1</sup> s <sup>-1</sup> | $k_{on\ HR^*Nb}$    | 10 μM <sup>-1</sup> s <sup>-1</sup> |
| $k_{reverse\ G}$               | 0.000025 s <sup>-1</sup> | $k_{off\ HR^*G}$        | 0.006 s <sup>-1</sup>                  | $k_{off\ HR^*Nb}$   | 0.01 s <sup>-1</sup>                |

## b. Integration 1: Simulate GPCR-G peptide interactions to steady state

### Simulation Conditions

|                  |                   | Initial Species |  |
|------------------|-------------------|-----------------|--|
| [Receptor]       | 0.01 μM           | HR'             |  |
| [G protein]      | 10 μM             | G               |  |
| [Nb]             | 0 μM              |                 |  |
| Integration time | 10 <sup>6</sup> s |                 |  |

### Integration 1 results

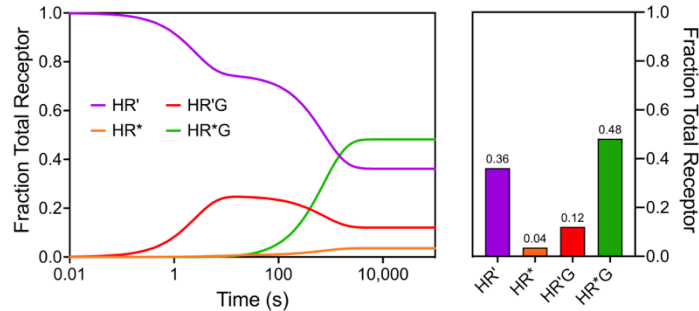

## d. Integration 2 results

Measure changes in ternary complex formation over stopped-flow time frame (120 s)

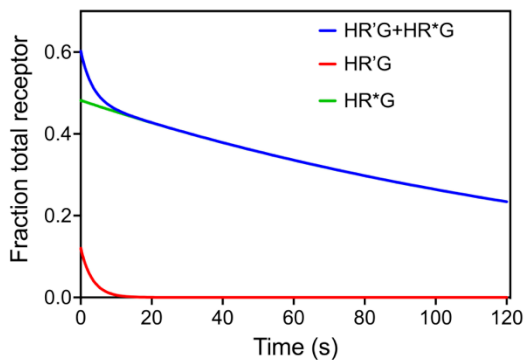

## c. Integration 2: Initial conditions

Initial receptor and G protein concentrations determined by the end point of integration 1

| Initial conditions |           |
|--------------------|-----------|
| HR'                | 0.0036 μM |
| HR*                | 0.0004 μM |
| HR'G               | 0.0012 μM |
| HR*G               | 0.0048 μM |
| G protein          | 9.994 μM  |
| Nb                 | 10 μM     |
| Integration time   | 120 s     |

**Supplemental Figure 8: Kinetic modeling for stopped flow quench experiments.** (a) Parameters for G protein and nanobody (Nb) parameters (b) The first integration with 10 μM G protein and 0 μM Nb was run to steady-state conditions (10<sup>6</sup> s). The end point for each receptor species (bar graph) was stored and used as the (c) initial conditions for a second integration, which was run for 120 s, the length of the experiment, with 10 μM Nb (d) Second integration shows a decrease in the fraction of ternary complex (HR'G+HR\*G). Due to slow interconversion rates, the decrease in the fraction of HR'G occurs rapidly while the decrease in HR\*G occurs slowly

a.

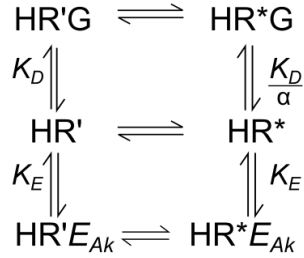

b.

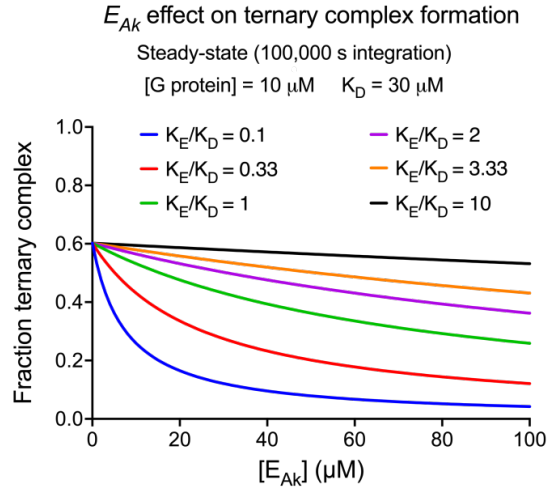

c.

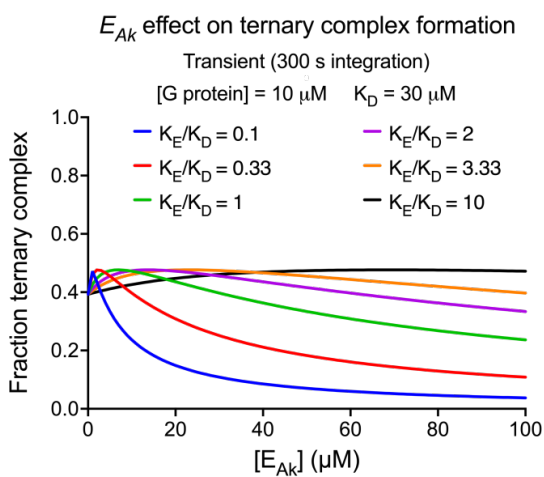

d.

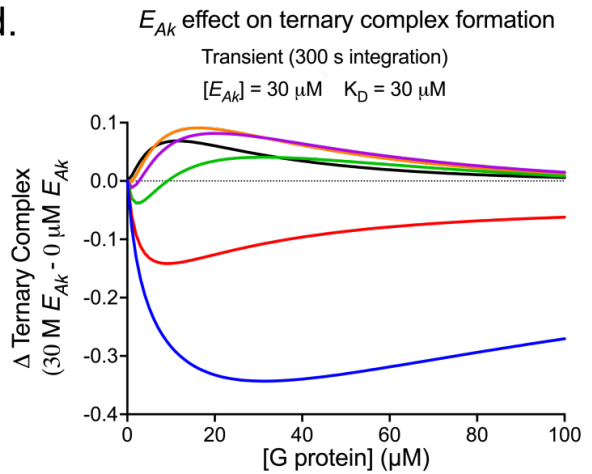

**Supplemental Figure 9:  $E_{Ak}$  binding affinity ( $K_E$ ) affects ternary complex formation** (a) Kinetic modulation model shows  $E_{Ak}$  binds to  $\text{HR}'$  and  $\text{HR}^*$  with the same affinity,  $K_E$ . All simulations were run using the G protein binding parameters in SFigure 5.  $K_E$  values from 3  $\mu\text{M}$  to 300  $\mu\text{M}$  were used and are shown in each panel as the ratio  $K_E/K_D$  (b) Steady state simulations show that the presence of  $E_{Ak}$  decreases ternary complex formation with 10  $\mu\text{M}$  G protein at all values of  $K_E$  (c) Transient simulations with 10  $\mu\text{M}$  G protein show that ternary complex formation is enhanced when  $K_E/K_D \geq 1$  (green, purple, orange, black). (d) Change in ternary complex formation with 30  $\mu\text{M}$   $E_{Ak}$  shows that the greatest enhancement occurs when  $10 > K_E/K_D > 1$  (orange, purple).

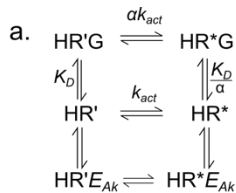

Change  $K_D$  and  $\alpha$ , keep  $K_D/\alpha$  constant

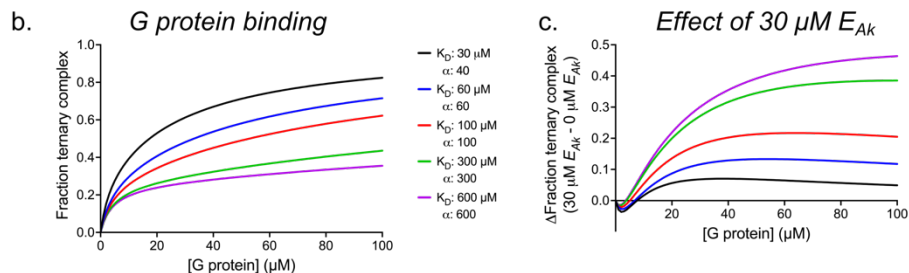

Change  $K_D$ ,  $\alpha$ , and  $K_D/\alpha$

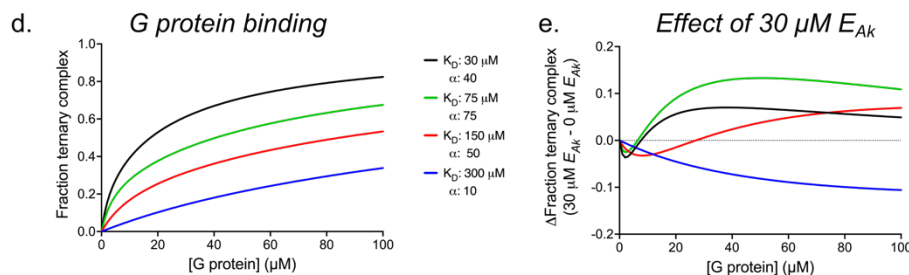

Change  $K_D/\alpha$  and  $\alpha$ , keep  $K_D$  constant

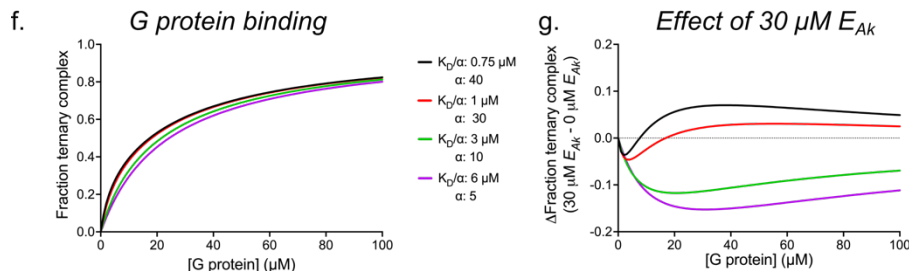

Change  $k_{act}$

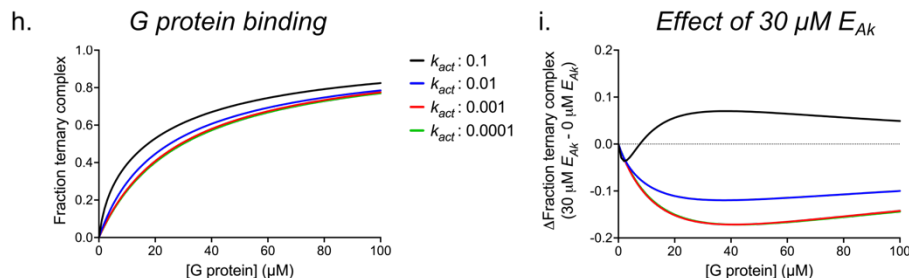

**Supplemental Figure 10: Decreased binding to HR'G has the greatest effect on ternary complex formation. (b), (d), (f), (h)** Ternary complex formation with specified binding and interconversion rates with no  $E_{Ak}$  present. **(c), (e), (g), (i)** Change in ternary complex formation with 30 μM  $E_{Ak}$  present under the specified binding and receptor interconversion constants. **(b), (d)** Increasing  $K_D$  and  $\alpha$  show the greatest decrease in ternary complex formation and **(c), (e)** 30 μM  $E_{Ak}$  increases ternary complex formation with 10 μM G protein.

**Supplemental Table 1: Parameters used for each simulation, by figure in main manuscript.** On-rates are indicated as  $k.interacting\ species\_p$  and in units of  $\mu M^{-1} s^{-1}$ . Off-rates are indicated as  $k.interacting\ species\_m$  and in units of  $s^{-1}$ . The remaining rates are interconversion rates in  $s^{-1}$ . Initial species concentrations are in  $\mu M$ . Gray boxes indicate parameters that are changed from the standard simulation parameters listed in Supplemental Figure 5.

| Parameter name           |                       | Parameter value                                                                                                                          |                     |                     |                     |                       |
|--------------------------|-----------------------|------------------------------------------------------------------------------------------------------------------------------------------|---------------------|---------------------|---------------------|-----------------------|
| In code                  | In manuscript         | Fig 1G                                                                                                                                   | Fig 2B              | Fig 2E              | Fig 3C              | Fig 4C                |
| R1_tot                   | HR' (or R or S)       | 0.01                                                                                                                                     | 0.01                | 0.01                | 0.01                | 0.01                  |
| Gc_tot                   | G (Gs or Spep or E1)  | 10                                                                                                                                       | 0 to 100            | 30                  | 0 to 100            | 10                    |
| Gn_tot                   | EAK (Gq or Qp or E2)  | 0, 30 **                                                                                                                                 | 0,10,30             | 0, 10               | 0, 30               | 0 to 100              |
| R1dash                   | HR* (or R' or P)      | 0                                                                                                                                        | 0                   | 0                   | 0                   | 0                     |
| k.Gc_R1_p                | k_on_HR'G             | 0.01                                                                                                                                     | 0.01                | 0.01                | [0.01, 0.001]       | 0.01                  |
| k.Gc_R1_m                | k_off_HR'G            | 0.3                                                                                                                                      | 0.3                 | 0.3                 | 0.3                 | 0.3                   |
| k.Gc_R1dash_p            | k_on_HR*G             | 0.008                                                                                                                                    | 0.008               | 0.008               | 0.008               | 0.008                 |
| k.Gc_R1dash_m            | k_off_HR*G            | 0.006                                                                                                                                    | 0.006               | 0.006               | 0.006               | 0.006                 |
| k.Gn_R1_p                | k_on_HR'E             | 10                                                                                                                                       | 0.1                 | 0.1                 | 0.01                | 0.1                   |
| k.Gn_R1_m                | k_off_HR'E            | 0.01                                                                                                                                     | 3                   | 3                   | 0.3                 | 3                     |
| k.Gn_R1dash_p            | k_on_HR*E             | 10                                                                                                                                       | 0.1                 | 0.1                 | 0.01                | 0.1                   |
| k.Gn_R1dash_m            | k_off_HR*E            | 0.01                                                                                                                                     | 3                   | 3                   | 0.3                 | 3                     |
| k.R1_R1dash              | k_forward             | 0.001                                                                                                                                    | 0.001               | 0.001               | 0.001               | 0.001                 |
| k.R1dash_R1              | k_reverse             | 0.01                                                                                                                                     | 0.01                | 0.01                | 0.01                | 0.01                  |
| k.GcR1_GcR1dash          | k_forwardG            | [0.0001, 0.001, 0.01, 0.1, 1]                                                                                                            | 0.001               | 0.001               | 0.001               | 0.001                 |
| k.GcR1dash_GcR1          | k_reverseG            | [0.000025, 0.00025, 0.0025, 0.025, 0.25]                                                                                                 | 0.00025             | 0.00025             | [0.00025, 0.000025] | 0.00025               |
| k.GnR1_GnR1dash          | k_forwardE            | 0                                                                                                                                        | 0.1                 | 0.1                 | 0.1                 | [0.001,0.01,0.1,1,10] |
| k.GnR1dash_GnR1          | k_reverseE            | 0                                                                                                                                        | 1                   | 1                   | 1                   | [0.01,0.1,1,10,100]   |
| <b>Binding constants</b> |                       |                                                                                                                                          |                     |                     |                     |                       |
|                          | alpha                 | 40                                                                                                                                       | 40                  | 40                  | [40,400]            | 40                    |
|                          | simulation time       | ** Note: No Gn initially, integrate till 1e6 sec, use ss values as initial condition for next integration till 120 sec where Gn is added | transient (300 sec) | transient (300 sec) | transient (300 sec) | transient (300 sec)   |
|                          | KD                    | 30                                                                                                                                       | 30                  | 30                  | [30,300]            | 30                    |
|                          | KD/alpha              | 0.75                                                                                                                                     | 0.75                | 0.75                | 0.75                | 0.75                  |
|                          | KE                    | 0.001                                                                                                                                    | 30                  | 30                  | 30                  | 30                    |
|                          | kforwardE / kreverseE | 0                                                                                                                                        | 0.1                 | 0.1                 | 0.1                 | 0.1                   |
|                          | Kact                  | 0.1                                                                                                                                      | 0.1                 | 0.1                 | 0.1                 | 0.1                   |

**Supplemental Table 2: Parameters used for each simulation, by figure in the supplemental materials.** On-rates are indicated as  $k.interactingspecies\_p$  and in units of  $\mu\text{M}^{-1} \text{s}^{-1}$ . Off-rates are indicated as  $k.interactingspecies\_m$  and in units of  $\text{s}^{-1}$ . The remaining rates are interconversion rates in  $\text{s}^{-1}$ . Initial species concentrations are in  $\mu\text{M}$ . Gray boxes indicate parameters that are changed from the standard simulation parameters listed in S Figure 5.

| Parameter name           |                        | Parameter value                                                                                                                          |                                |                                |                                |                              |                              |                              |                              |                              |                              |                          |                         |  |
|--------------------------|------------------------|------------------------------------------------------------------------------------------------------------------------------------------|--------------------------------|--------------------------------|--------------------------------|------------------------------|------------------------------|------------------------------|------------------------------|------------------------------|------------------------------|--------------------------|-------------------------|--|
| In code                  | In manuscript          | Fig S8                                                                                                                                   | Fig S9 B                       | Fig S9 C                       | Fig S9 D                       | Fig S10 B                    | Fig S10 C                    | Fig S10 D                    | Fig S10 E                    | Fig S10 F                    | Fig S10 G                    | Fig S10 H                | Fig S10 I               |  |
| R1_tot                   | HR' (or R or S)        | 0.01                                                                                                                                     | 0.01                           | 0.01                           | 0.01                           | 0.01                         | 0.01                         | 0.01                         | 0.01                         | 0.01                         | 0.01                         | 0.01                     | 0.01                    |  |
| Gc_tot                   | G (Gs or Spep or E1)   | 10                                                                                                                                       | 10                             | 10                             | 0 to 100                       | 0 to 100                     | 0 to 100                     | 0 to 100                     | 0 to 100                     | 0 to 100                     | 0 to 100                     | 0 to 100                 | 0 to 100                |  |
| Gn_tot                   | EAK (Gq or Qpep or E2) | 0, 10 **                                                                                                                                 | 0 to 100                       | 0 to 100                       | 0, 30                          | 0                            | 0, 30                        | 0                            | 0, 30                        | 0                            | 0, 30                        | 0                        | 0, 30                   |  |
| R1dash                   | HR* (or R' or P)       | 0                                                                                                                                        | 0                              | 0                              | 0                              | 0                            | 0                            | 0                            | 0                            | 0                            | 0                            | 0                        | 0                       |  |
| k.Gc_R1_p                | k_on_HR'G              | 0.01                                                                                                                                     | 0.01                           | 0.01                           | 0.01                           | adjusted as per KD value     | adjusted as per KD value     | adjusted as per KD value     | adjusted as per KD value     | adjusted as per KD value     | adjusted as per KD value     | adjusted as per KD value | 0.01                    |  |
| k.Gc_R1_m                | k_off_HR'G             | 0.3                                                                                                                                      | 0.3                            | 0.3                            | 0.3                            | 0.3                          | 0.3                          | 0.3                          | 0.3                          | 0.3                          | 0.3                          | 0.3                      | 0.3                     |  |
| k.Gc_R1dash_p            | k_on_HR*G              | 0.008                                                                                                                                    | 0.008                          | 0.008                          | 0.008                          | 0.008                        | 0.008                        | adjusted as per KD and alpha | adjusted as per KD and alpha | adjusted as per KD and alpha | adjusted as per KD and alpha | 0.008                    | 0.008                   |  |
| k.Gc_R1dash_m            | k_off_HR*G             | 0.006                                                                                                                                    | 0.006                          | 0.006                          | 0.006                          | adjusted as per KD and alpha | adjusted as per KD and alpha | 0.006                        | 0.006                        | 0.006                        | 0.006                        | 0.006                    | 0.006                   |  |
| k.Gn_R1_p                | k_on_HR'E              | 10                                                                                                                                       | 0.01                           | 0.01                           | 0.01                           | 0.1                          | 0.1                          | 0.1                          | 0.1                          | 0.1                          | 0.1                          | 0.1                      | 0.1                     |  |
| k.Gn_R1_m                | k_off_HR'E             | 0.01                                                                                                                                     | 0.3 (varied as per KE)         | 0.3 (varied as per KE)         | 0.3 (varied as per KE)         | 3                            | 3                            | 3                            | 3                            | 3                            | 3                            | 3                        | 3                       |  |
| k.Gn_R1dash_p            | k_on_HR'E              | 10                                                                                                                                       | 0.01                           | 0.01                           | 0.01                           | 0.1                          | 0.1                          | 0.1                          | 0.1                          | 0.1                          | 0.1                          | 0.1                      | 0.1                     |  |
| k.Gn_R1dash_m            | k_off_HR'E             | 0.01                                                                                                                                     | 0.3 (varied as per KE)         | 0.3 (varied as per KE)         | 0.3 (varied as per KE)         | 3                            | 3                            | 3                            | 3                            | 3                            | 3                            | 3                        | 3                       |  |
| k.R1_R1dash              | k_forward              | 0.001                                                                                                                                    | 0.001                          | 0.001                          | 0.001                          | 0.001                        | 0.001                        | 0.001                        | 0.001                        | 0.001                        | 0.001                        | adjusted as per Kact     | 0.001                   |  |
| k.R1dash_R1              | k_reverse              | 0.01                                                                                                                                     | 0.01                           | 0.01                           | 0.01                           | 0.01                         | 0.01                         | 0.01                         | 0.01                         | 0.01                         | 0.01                         | 0.01                     | adjusted as per Kact    |  |
| k.GcR1_GcR1dash          | k_forwardG             | 0.0001                                                                                                                                   | 0.001                          | 0.001                          | 0.001                          | 0.001                        | 0.001                        | adjusted as per alpha value  | adjusted as per alpha value  | 0.001                        | 0.001                        | 0.0001                   | 0.0001                  |  |
| k.GcR1dash_GcR1          | k_reverseG             | 0.000025                                                                                                                                 | 0.00025                        | 0.00025                        | 0.00025                        | adjusted as per alpha value  | adjusted as per alpha value  | 0.00025                      | 0.00025                      | adjusted as per alpha value  | adjusted as per alpha value  | adjusted as per Kact     | adjusted as per Kact    |  |
| k.GnR1_GnR1dash          | k_forwardE             | 0                                                                                                                                        | 0.1                            | 0.1                            | 0.1                            | 0.1                          | 0.1                          | 0.1                          | 0.1                          | 0.1                          | 0.1                          | 0.1                      | 0.1                     |  |
| k.GnR1dash_GnR1          | k_reverseE             | 0                                                                                                                                        | 1                              | 1                              | 1                              | 1                            | 1                            | 1                            | 1                            | 1                            | 1                            | adjusted as per Kact     | adjusted as per Kact    |  |
| <b>Binding constants</b> |                        |                                                                                                                                          |                                |                                |                                |                              |                              |                              |                              |                              |                              |                          |                         |  |
|                          | alpha                  | 40                                                                                                                                       | 40                             | 40                             | 40                             | [30,60,100,300,600]          | [30,60,100,300,600]          | [40,75,50,10]                | [40,75,50,10]                | [40,30,10,5]                 | [40,30,10,5]                 | 40                       | 40                      |  |
|                          | simulation time        | ** Note: No Gn initially, integrate till 1e6 sec, use ss values as initial condition for next integration till 120 sec where Gn is added | steady state (1e5 sec)         | transient (300 sec)            | transient (300 sec)            | transient (300 sec)          | transient (300 sec)          | transient (300 sec)          | transient (300 sec)          | transient (300 sec)          | transient (300 sec)          | transient (300 sec)      | transient (300 sec)     |  |
|                          | KD                     | 30                                                                                                                                       | 30                             | 30                             | 30                             | [30,60,100,300,600]          | [30,60,100,300,600]          | [30,75,150,300]              | [30,75,150,300]              | 30                           | 30                           | 30                       | 30                      |  |
|                          | KD/alpha               | 0.75                                                                                                                                     | 0.75                           | 0.75                           | 0.75                           | 1                            | 1                            | [0.75,1,3,30]                | [0.75,1,3,30]                | [0.75,1,3,6]                 | [0.75,1,3,6]                 | 0.75                     | 0.75                    |  |
|                          | KE                     | 0.001                                                                                                                                    | [3,9,9,30,60,99,9,300]         | [3,9,9,30,60,99,9,300]         | [3,9,9,30,60,99,9,300]         | 30                           | 30                           | 30                           | 30                           | 30                           | 30                           | 30                       | 30                      |  |
|                          | kforwardE / kreverseE  | 0                                                                                                                                        | 0.1                            | 0.1                            | 0.1                            | 0.1                          | 0.1                          | 0.1                          | 0.1                          | 0.1                          | 0.1                          | adjusted as per Kact     | adjusted as per Kact    |  |
|                          | Kact                   | 0.1                                                                                                                                      | 0.1                            | 0.1                            | 0.1                            | 0.1                          | 0.1                          | 0.1                          | 0.1                          | 0.1                          | 0.1                          | [0.1,0.01,0.001,0.0001]  | [0.1,0.01,0.001,0.0001] |  |
|                          |                        |                                                                                                                                          | KE/KD = [0.1,0.33,1,2,3,33,10] | KE/KD = [0.1,0.33,1,2,3,33,10] | KE/KD = [0.1,0.33,1,2,3,33,10] |                              |                              |                              |                              |                              |                              |                          |                         |  |
